# Supplementary material for: Inhibition of mutant RAS-RAF interaction by mimicking structural and dynamic properties of phosphorylated RAS
Source: eLife journal article supplement (doi:10.7554/elife.79747), 2022-12-01
Supplement: supp [file elife-79747-supp-v2.zip]

# Supplementary Information:

## Inhibition of mutant RAS-RAF interaction by mimicking structural and dynamic properties of phosphorylated RAS

Metehan Ilter<sup>1,†,‡</sup>, Ramazan Kaşmer<sup>2,3,‡</sup>, Farzaneh Jalalypour<sup>4,§</sup>, Canan Atilgan<sup>4</sup>, Ozan Topcu<sup>2</sup>, Nihal Karakaş<sup>2,5,\*</sup>, Ozge Sensoy<sup>6,7,\*</sup>

**\*For correspondence:**

[nkarakas@medipol.edu.tr](mailto:nkarakas@medipol.edu.tr) (NK);  
[osensoy@medipol.edu.tr](mailto:osensoy@medipol.edu.tr) (OS)

<sup>†</sup>These authors contributed  
equally to this work

**Present address:** <sup>†</sup>Molecular  
Simulations and Design Group,  
Max Planck Institute for Dynamics  
of Complex Technical Systems,  
Magdeburg, Germany;  
<sup>§</sup>Department of Applied Physics,  
Science for Life Laboratory, KTH  
Royal Institute of Technology,  
Stockholm, Sweden

<sup>1</sup>Graduate School of Engineering and Natural Sciences, Istanbul Medipol University, Istanbul, Turkey; <sup>2</sup>Cancer Research Center, Institute for Health Sciences and Technologies (SABITA), Istanbul Medipol University, Istanbul, Turkey; <sup>3</sup>Medical Biology and Genetics Program, Graduate School for Health Sciences, Istanbul Medipol University, Istanbul Turkey; <sup>4</sup>Faculty of Engineering and Natural Sciences, Sabanci University, Istanbul, Turkey; <sup>5</sup>Department of Medical Biology, School of Medicine, Istanbul Medipol University, Istanbul, Turkey; <sup>6</sup>Department of Computer Engineering, School of Engineering and Natural Sciences, Istanbul Medipol University, Istanbul, Turkey; <sup>7</sup>Regenerative and Restorative Medicine Research Center (REMER), Institute for Health Sciences and Technologies (SABITA), Istanbul Medipol University, Istanbul, Turkey

**Supplementary file 1a** The average number of water molecules within 5 Å of GTP were calculated over the course of the ligand-bound HRAS<sup>G12D</sup> systems.

| Ligand-bound H-RAS <sup>G12D</sup> | $\mu_{\text{water}}$ |
|------------------------------------|----------------------|
| Cerubidine                         | 119.1±0.3            |
| Tranilast                          | 104.5 ±0.4           |
| Nilotinib                          | 95.3 ±0.5            |
| Epirubicin                         | 106.2 ±0.4           |

**Supplementary file 1b** Total simulation time performed for ligand- HRAS<sup>G12D</sup> complexes and changes in the backbone RMSF profiles of cerubidine-, tranilast-, nilotinib-, and epirubicin-bound HRAS<sup>G12D</sup> systems with respect to those of HRAS<sup>G12D</sup>.

| Ligand     | Duration (ns) | $\Delta\text{RMSF}(\text{Y32})$ (Å) | $\mu_{\Delta\text{RMSF}(\text{RAF-RBD})}$ (Å) | $\mu_{\Delta\text{RMSF}(\text{RAF-CRD})}$ (Å) |
|------------|---------------|-------------------------------------|-----------------------------------------------|-----------------------------------------------|
| Cerubidine | 3069          | 1.0 ± 0.4                           | 1.1 ± 0.6                                     | 0.2 ± 0.1                                     |
| Tranilast  | 3705          | 1.0 ± 0.6                           | 0.9 ± 0.7                                     | 0.3 ± 0.2                                     |
| Nilotinib  | 3053          | 1.4 ± 0.7                           | 1.5 ± 0.8                                     | 0.3 ± 0.2                                     |
| Epirubicin | 2884          | 2.1 ± 0.6                           | 1.6 ± 0.9                                     | 0.2 ± 0.2                                     |

**Supplementary file 1c** The results of PRS calculations for the transition between initial and target states.

| Ligand     | State          | D12-P34 (Å)             | G60-GTP (Å)  | PRS selected residues  | PRS overlap( <i>O'</i> ) |
|------------|----------------|-------------------------|--------------|------------------------|--------------------------|
| Nilotinib  | Target state-1 | 22.4 (open)             | 5.1 (closed) | 34, 35, 33, 37, 32, 36 | 0.70-0.62                |
|            | Target state-2 | 15.3 (partially open)   | 12.7 (open)  | 61, 62, 63, 23, 22, 65 | 0.57-0.51                |
|            | Target state-3 | 22.6 (open)             | 19.8 (open)  | 34, 35, 33, 37, 36, 66 | 0.66-0.59                |
| Tranilast  | Target state-1 | 27.0 (open)             | 9.1 (closed) | 32, 36, 33, 37, 34, 35 | 0.74-0.67                |
|            | Target state-2 | 14.8 (partially opened) | 12.3 (open)  | 22, 18, 23, 104, 87, 6 | 0.55-0.54                |
|            | Target state-3 | 20.1 (open)             | 14.8 (open)  | 34, 33, 35, 32, 37     | 0.54-0.50                |
| Epirubicin | Target state-1 | 29.0 (open)             | 7.7 (closed) | 32, 33, 34, 35, 37, 36 | 0.61-0.51                |
|            | Target state-2 | 13.3 (partially opened) | 17.8 (open)  | 63, 62                 | 0.51-0.50                |
|            | Target state-3 | 22.0 (open)             | 15.2 (open)  | 34, 35, 33, 37, 36, 66 | 0.61-0.59                |
