# Supplementary material for: Inhibition of mutant RAS-RAF interaction by mimicking structural and dynamic properties of phosphorylated RAS
Source: eLife journal article supplement (doi:10.7554/elife.79747), 2022-12-01
Supplement: supp [file elife-79747-supp-v2.zip]

Archive with 13 entries (13 files):
- elife_poa_e79747_Figure_2_figure_supplement_1.png
- elife_poa_e79747_Figure_2_figure_supplement_2.png
- elife_poa_e79747_Figure_3_figure_supplement_1.png
- elife_poa_e79747_Figure_4=figure_supplement_1.png
- elife_poa_e79747_Figure_4_figure_supplement_2.png
- elife_poa_e79747_Figure_4_figure_supplement_3.png
- elife_poa_e79747_Figure_5_figure_supplement_1.png
- elife_poa_e79747_Figure_7_figure_supplement_1.png
- elife_poa_e79747_Figure_7_figure_supplement_2.png
- elife_poa_e79747_Figure_7_figure_supplement_3.png
- elife_poa_e79747_Source_data_1.zip
- elife_poa_e79747_Source_data_2.zip
- elife_poa_e79747_Supplementary_File_1.pdf
