# Supplementary figures and images for: Inhibition of mutant RAS-RAF interaction by mimicking structural and dynamic properties of phosphorylated RAS
Source: eLife journal article supplement (doi:10.7554/elife.79747), 2022-12-01

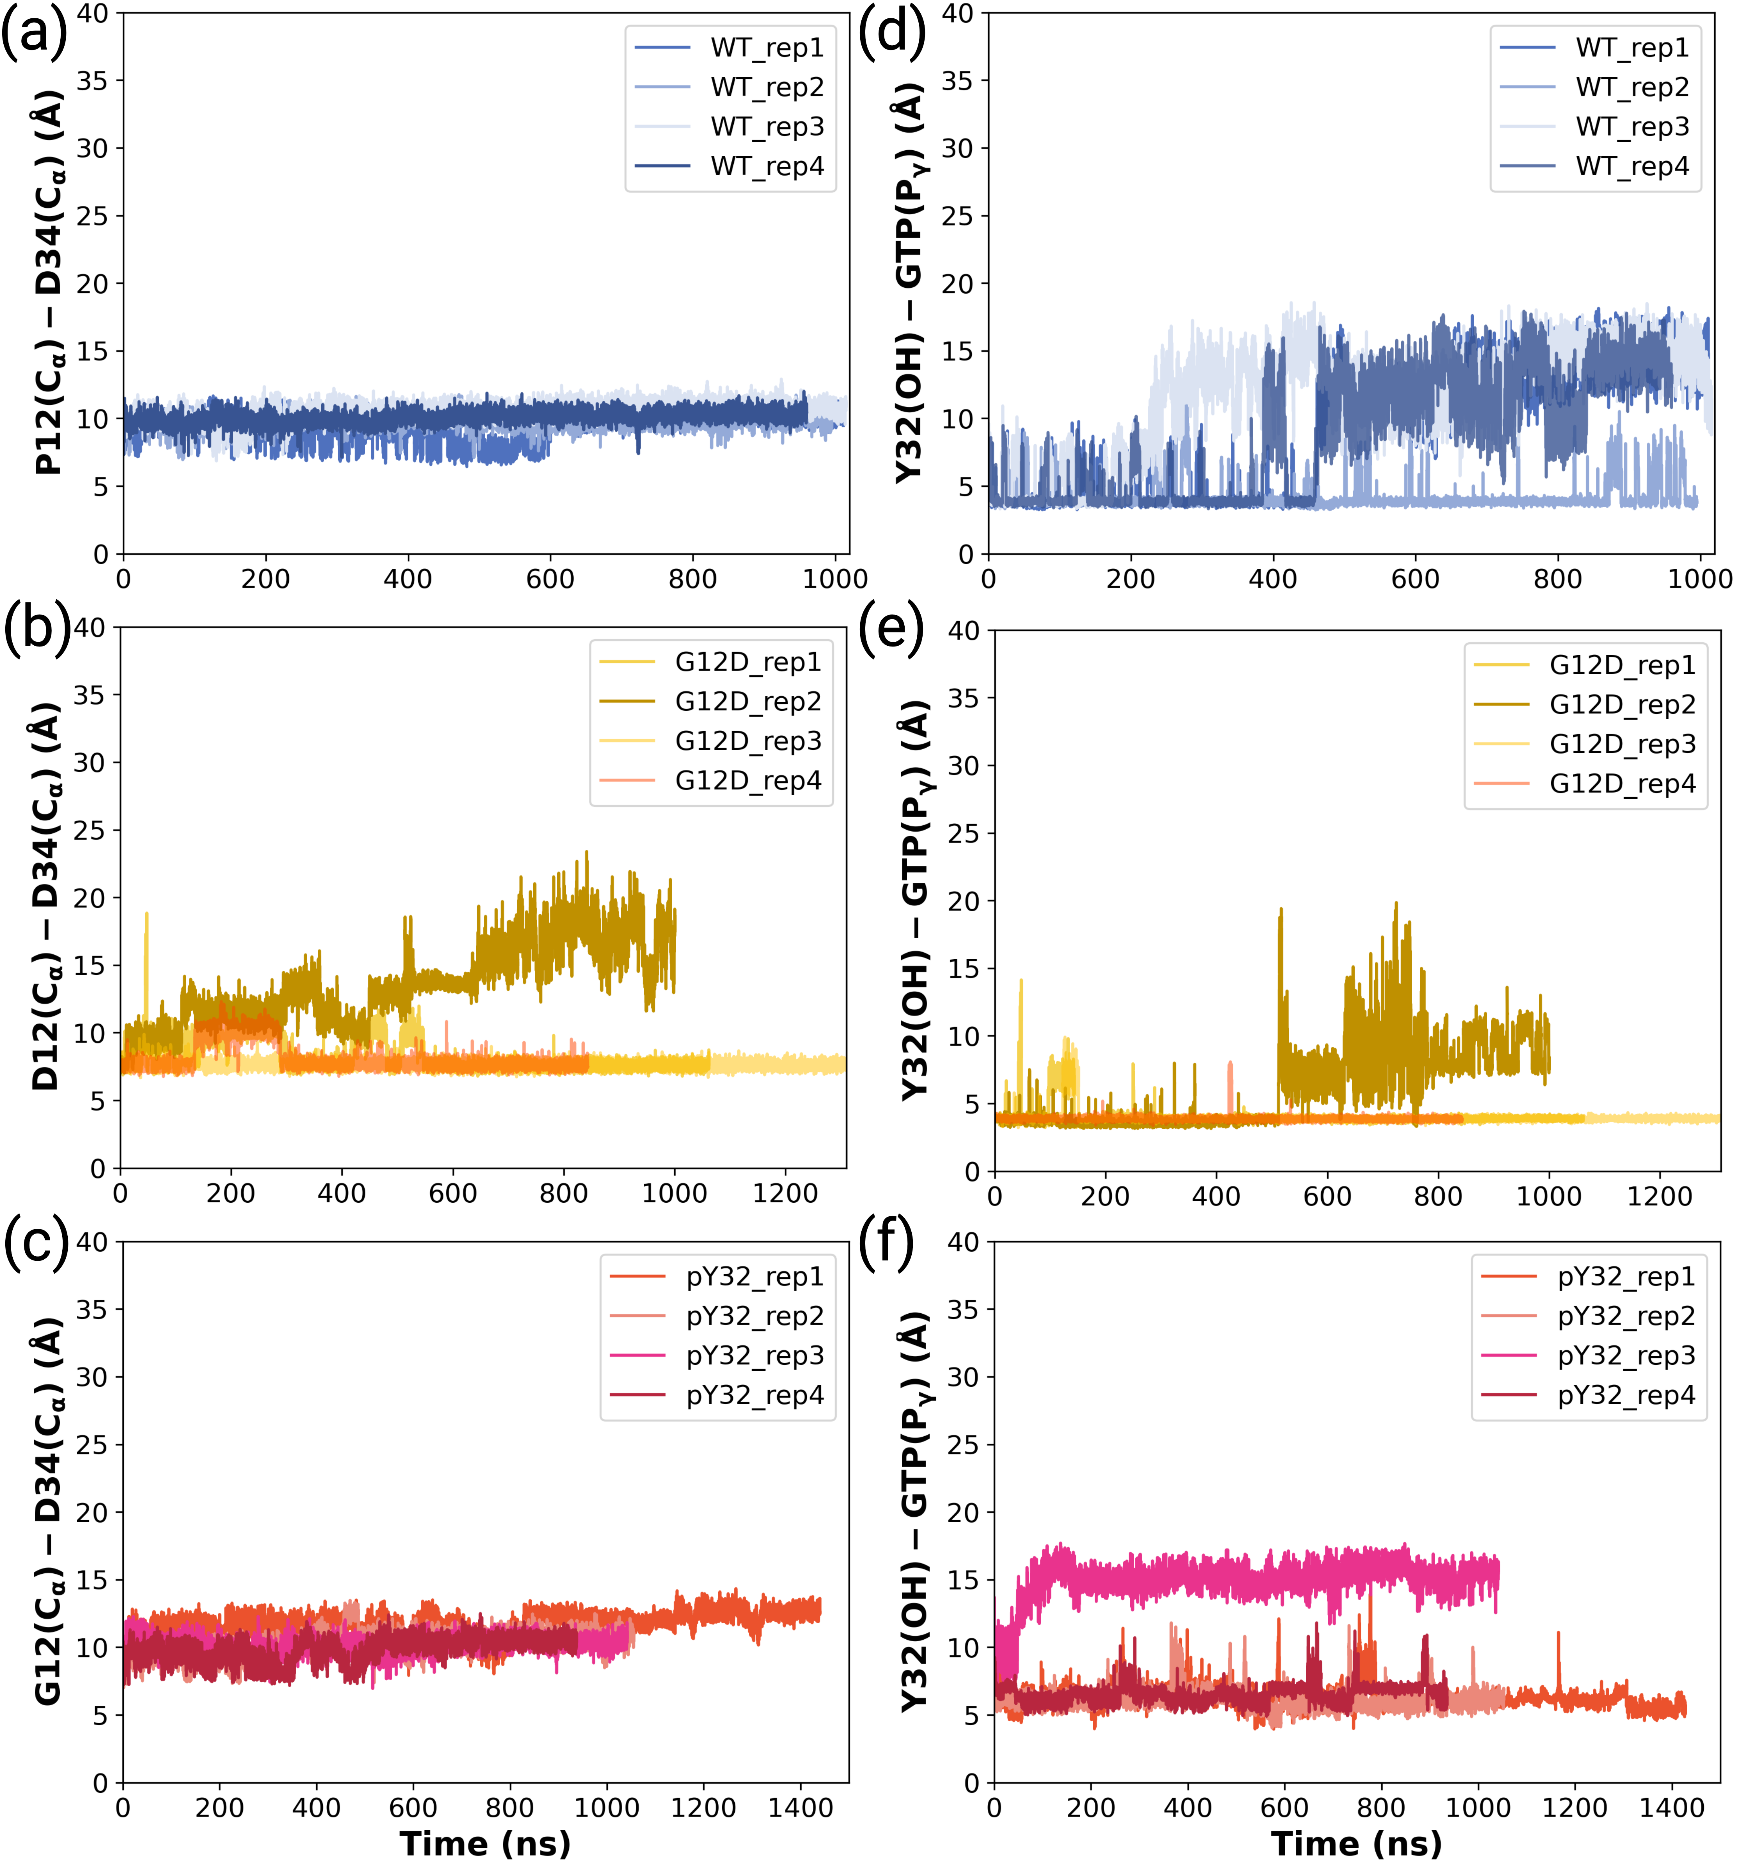

Supplement: supp [file elife-79747-supp-v2.zip › elife_poa_e79747_Figure_2_figure_supplement_1.png]

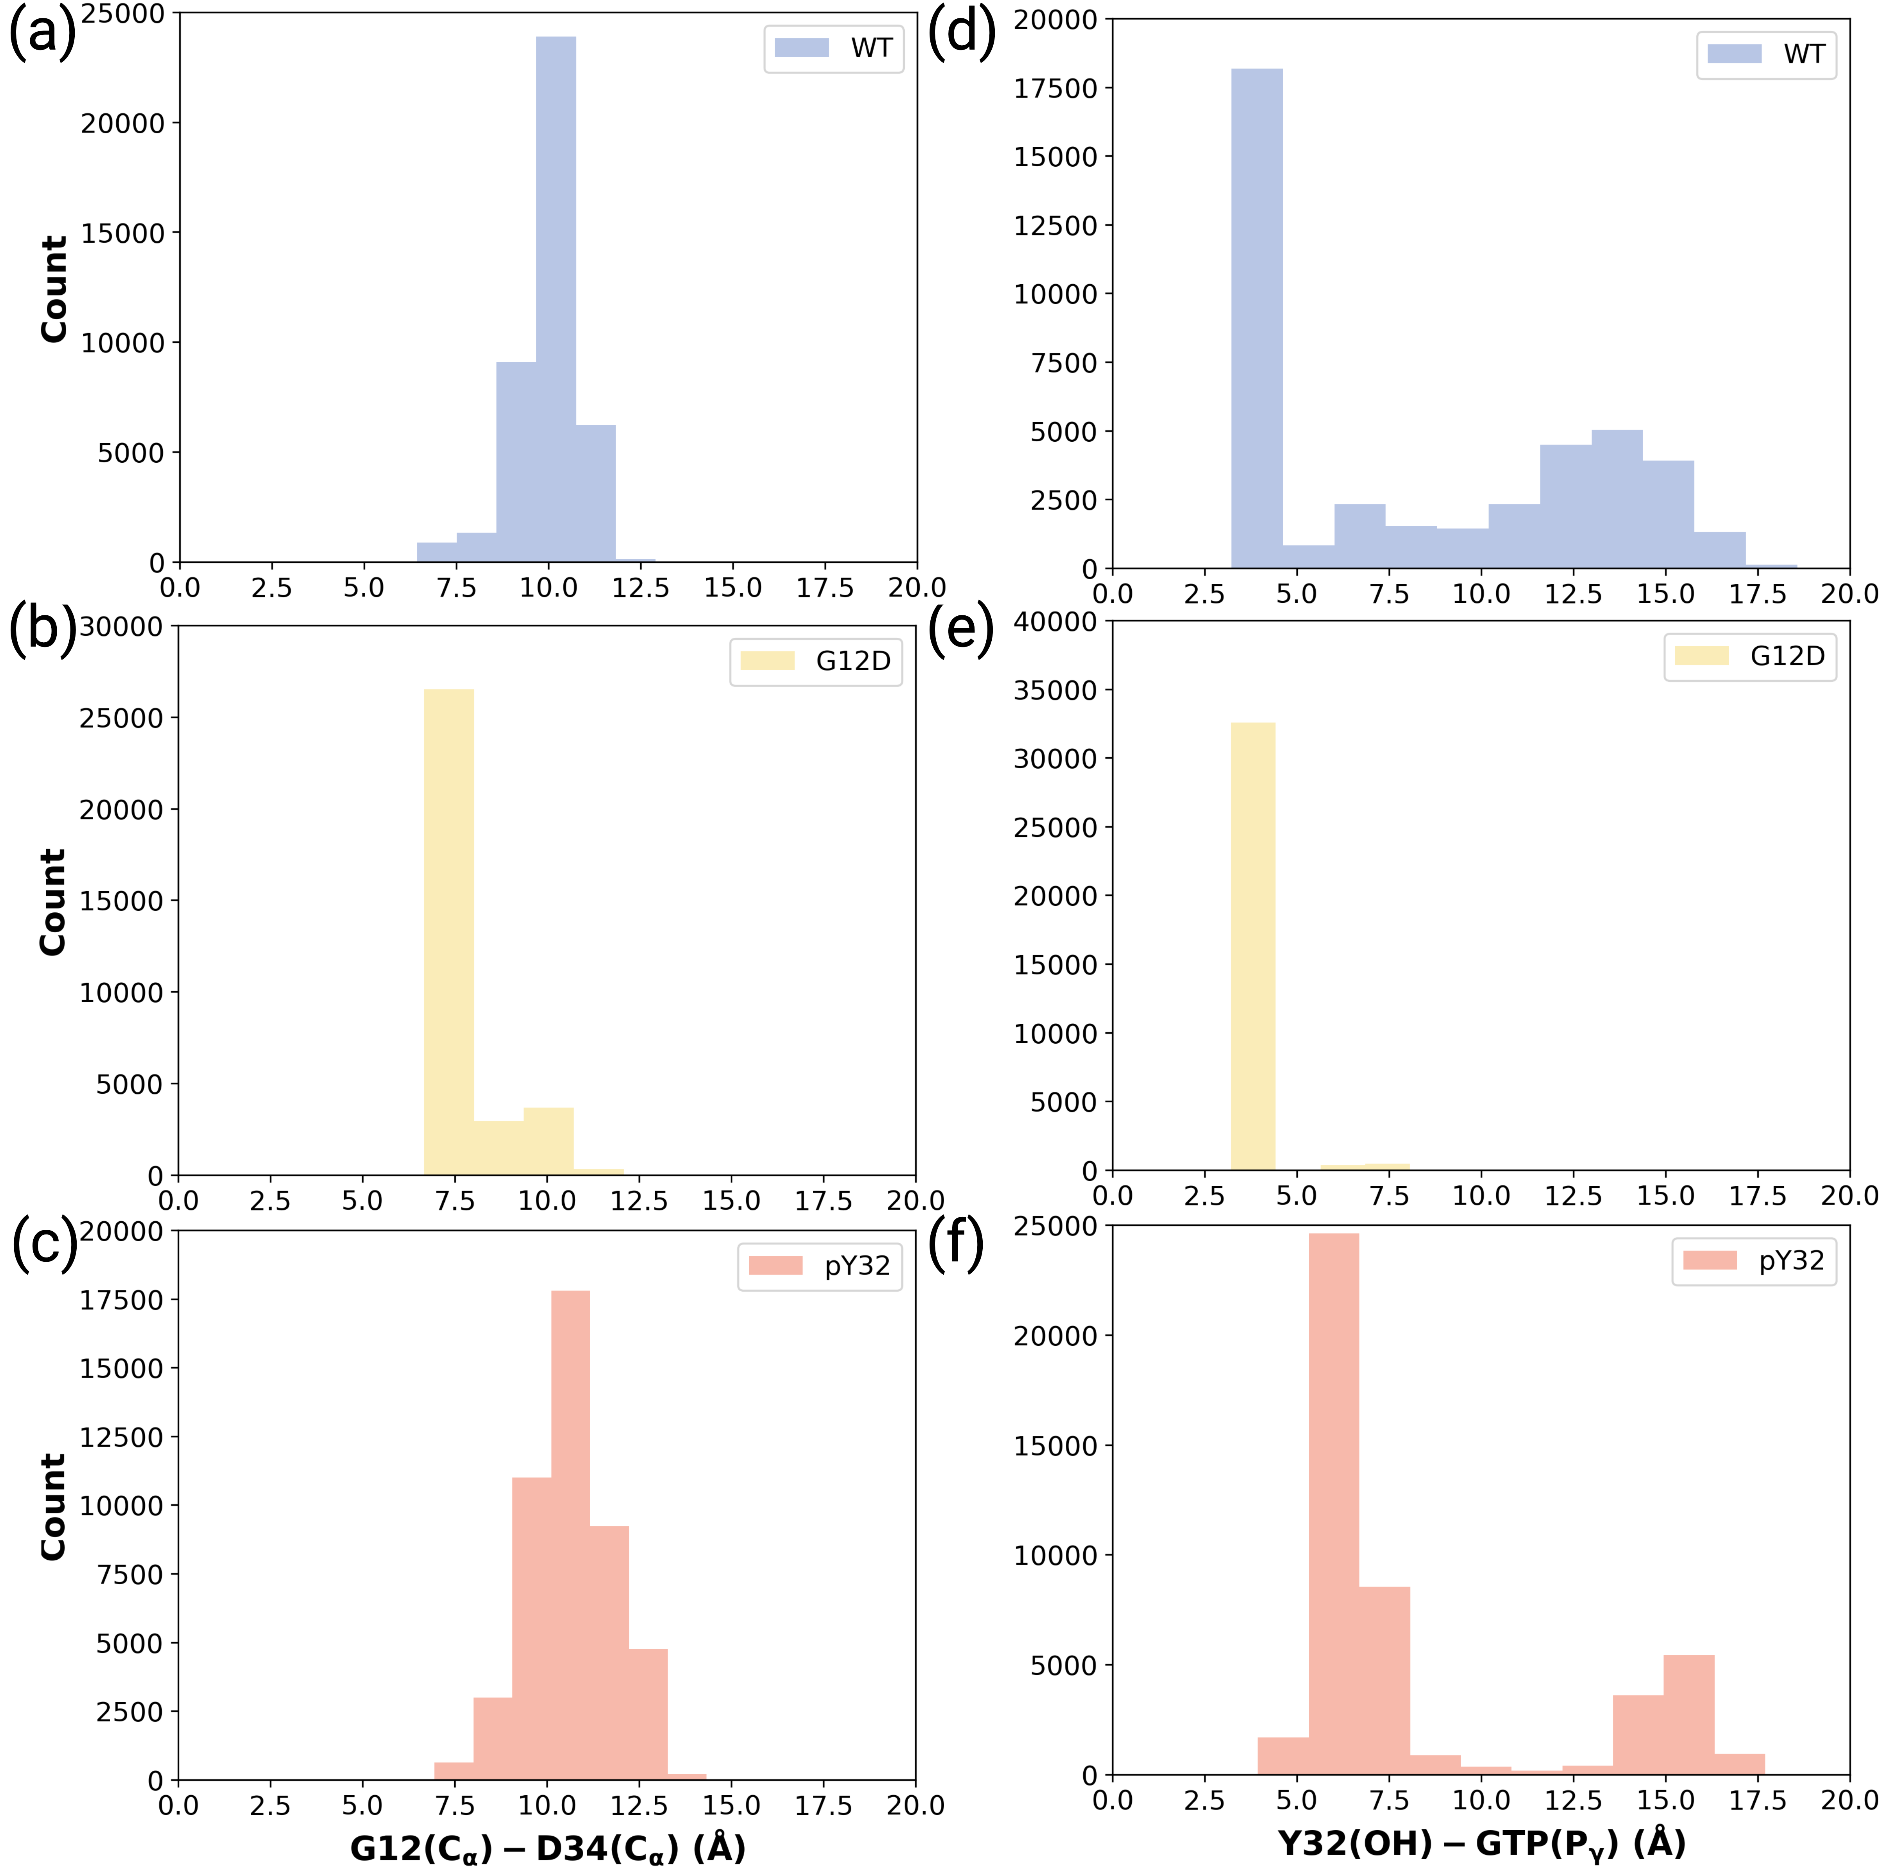

Supplement: supp [file elife-79747-supp-v2.zip › elife_poa_e79747_Figure_2_figure_supplement_2.png]

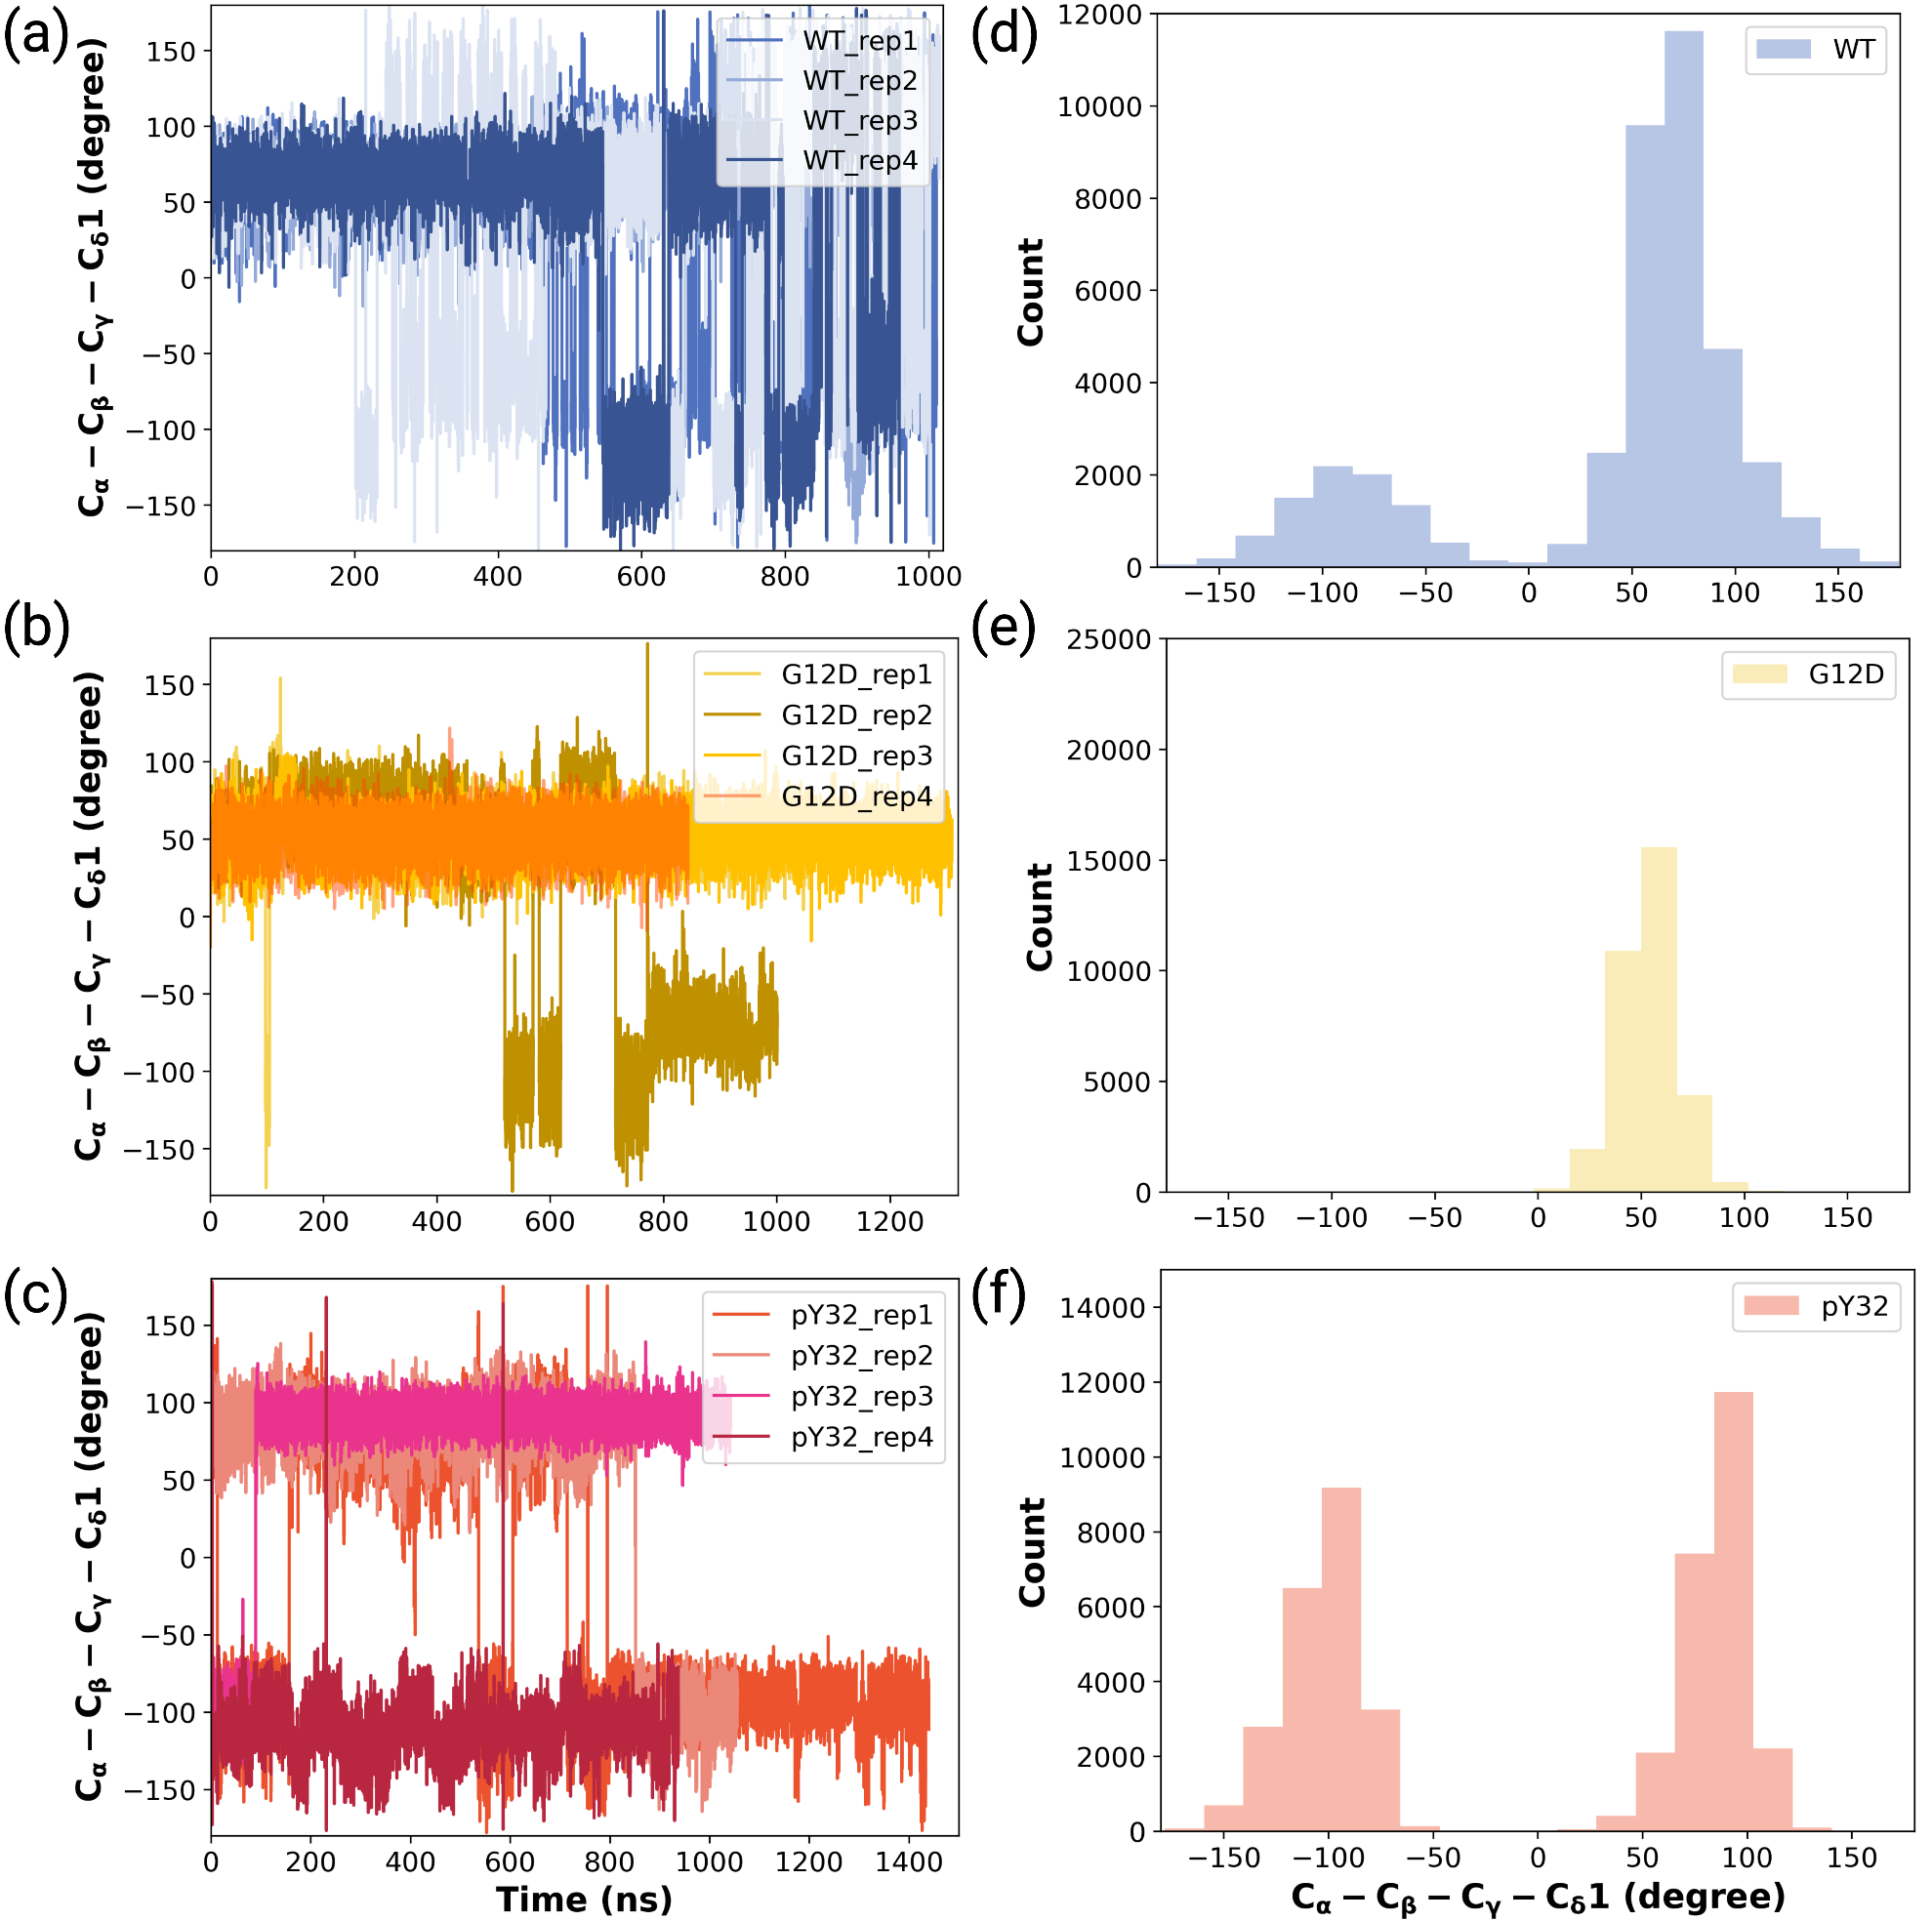

Supplement: supp [file elife-79747-supp-v2.zip › elife_poa_e79747_Figure_3_figure_supplement_1.png]

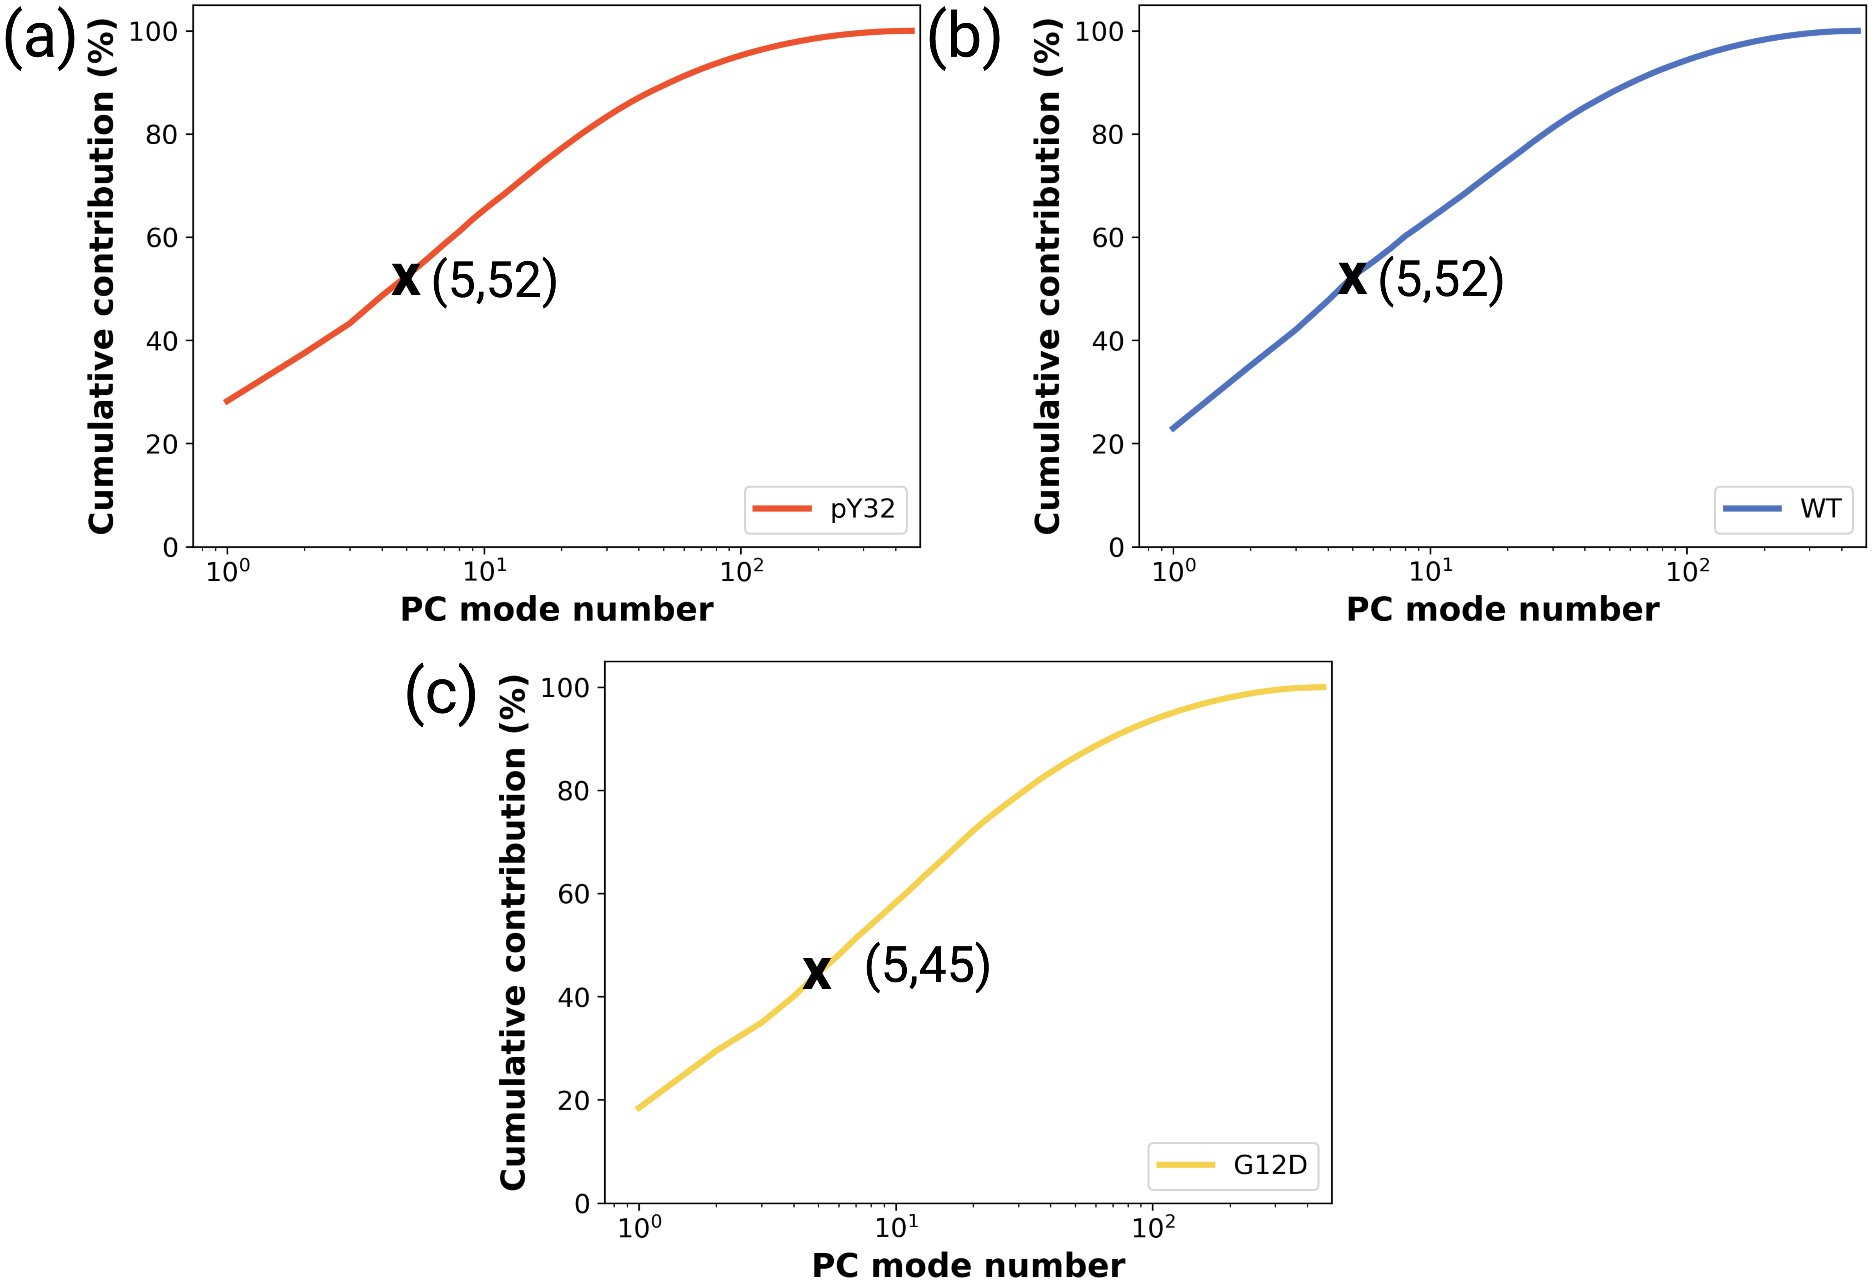

Supplement: supp [file elife-79747-supp-v2.zip › elife_poa_e79747_Figure_4=figure_supplement_1.png]

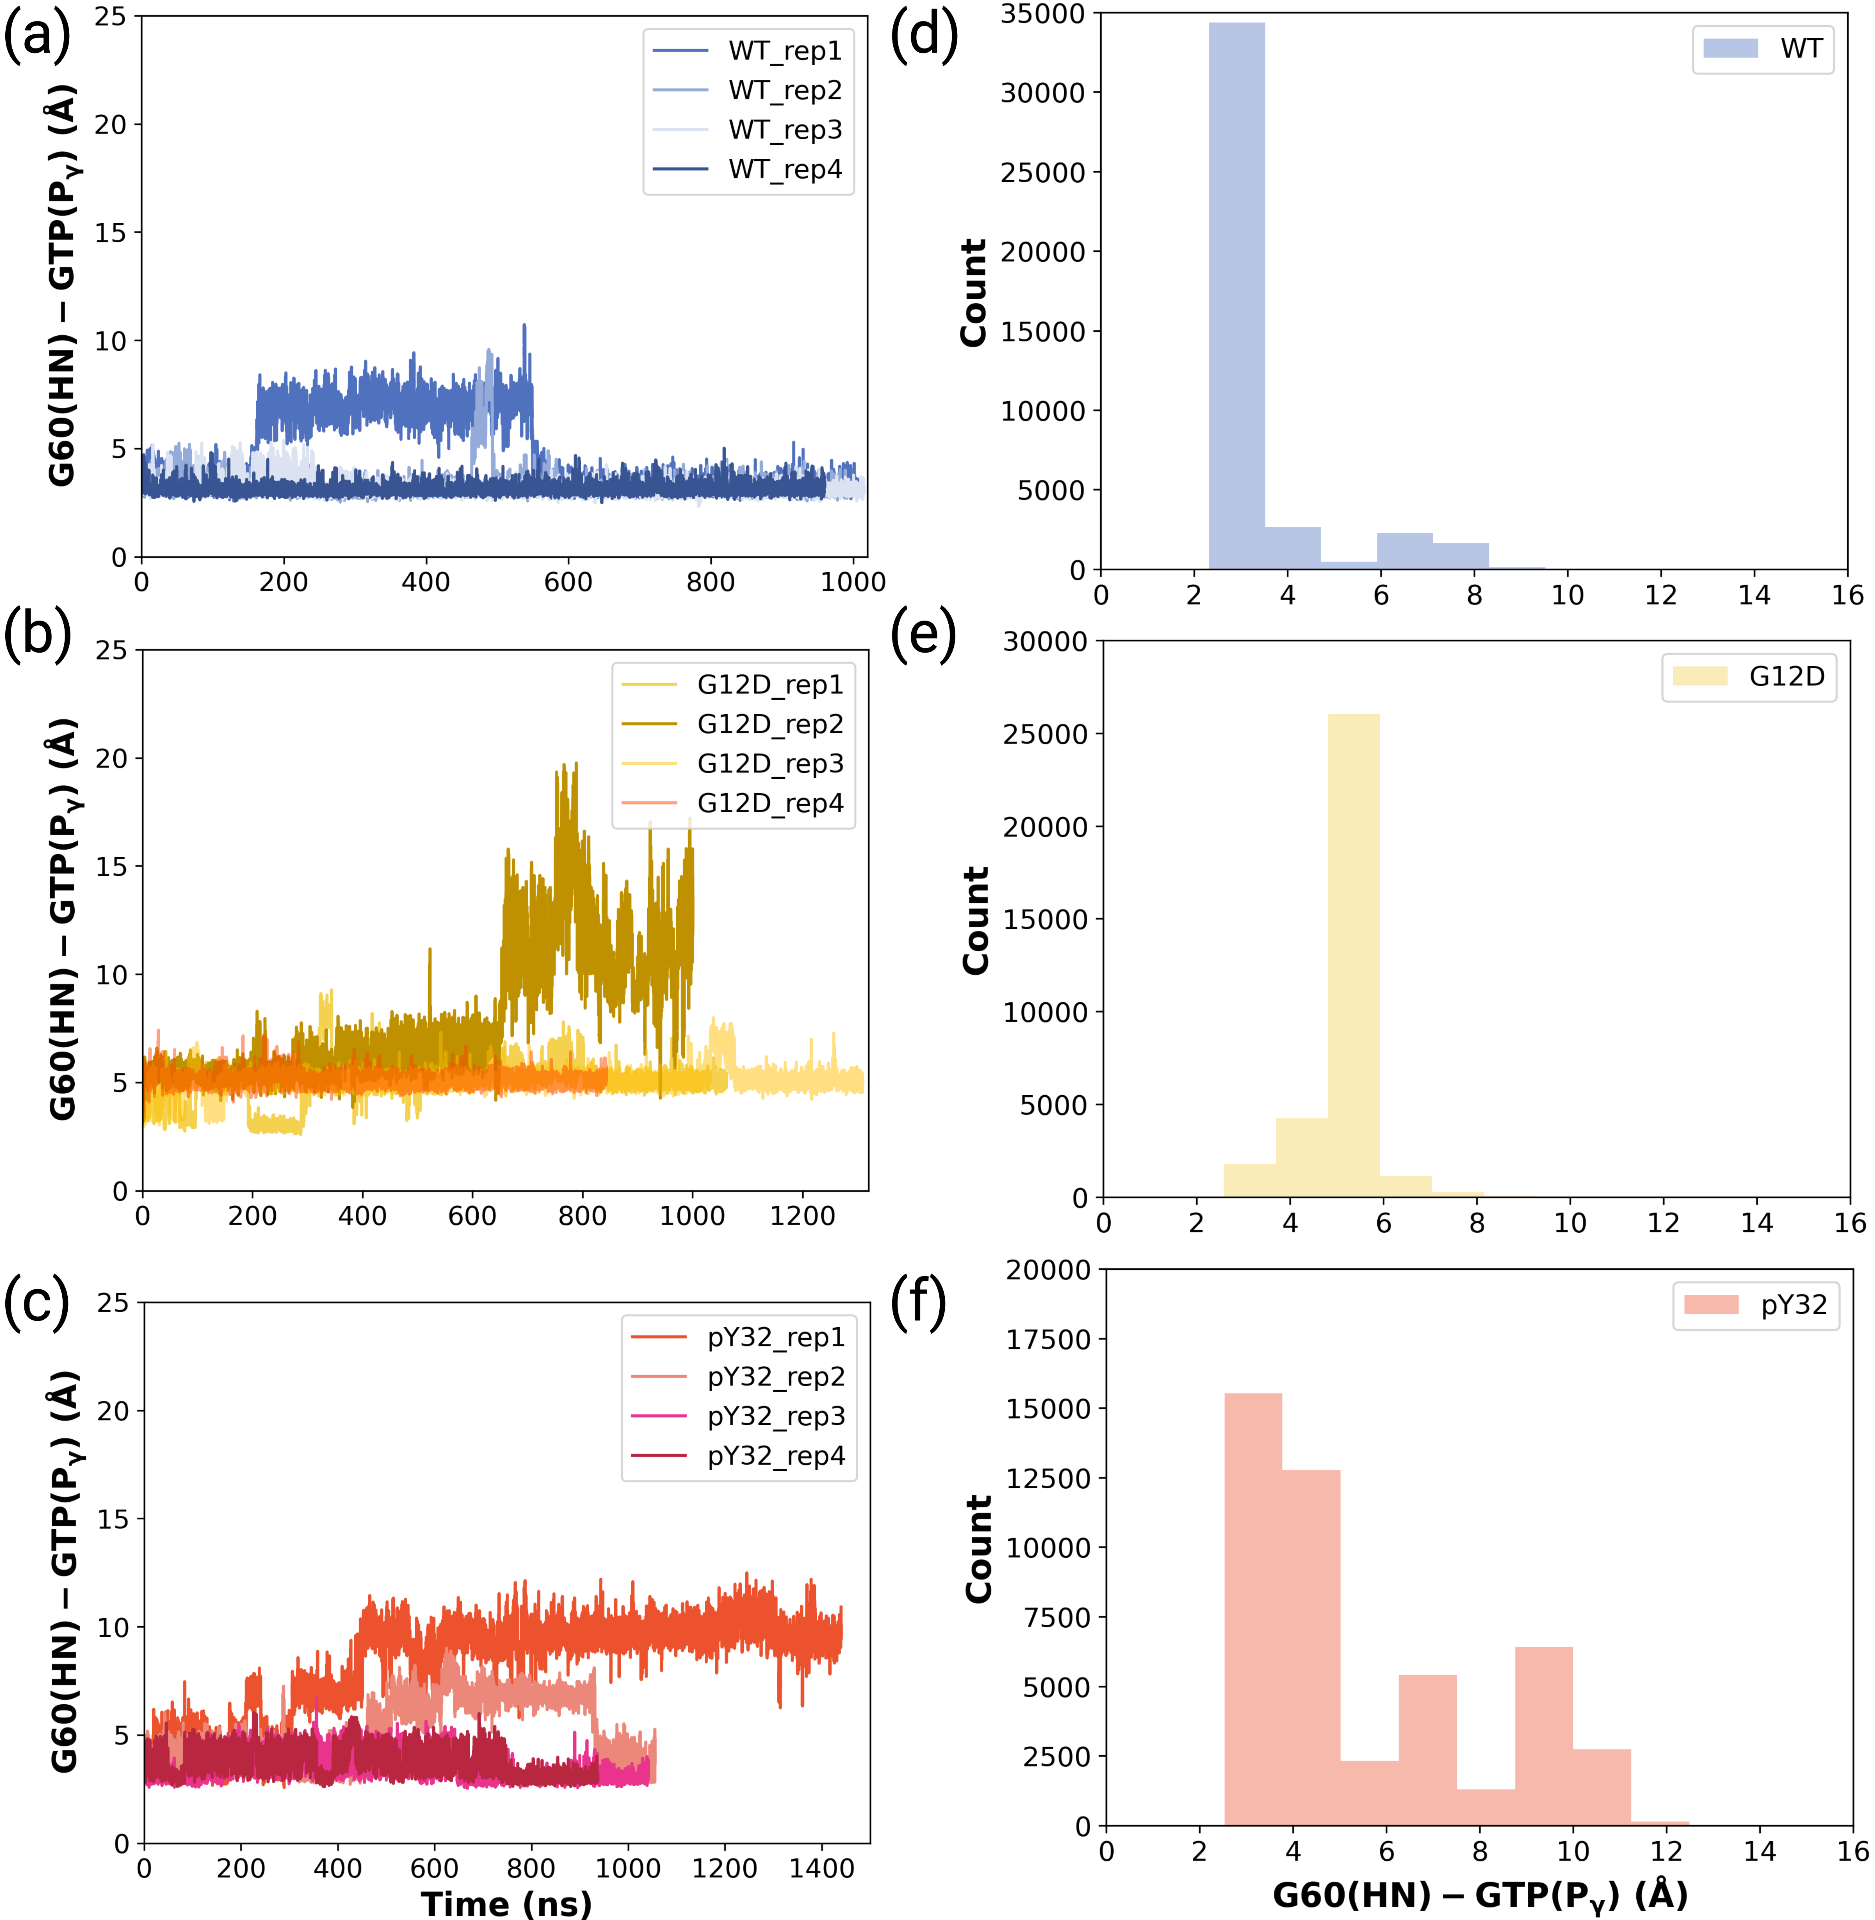

Supplement: supp [file elife-79747-supp-v2.zip › elife_poa_e79747_Figure_4_figure_supplement_2.png]

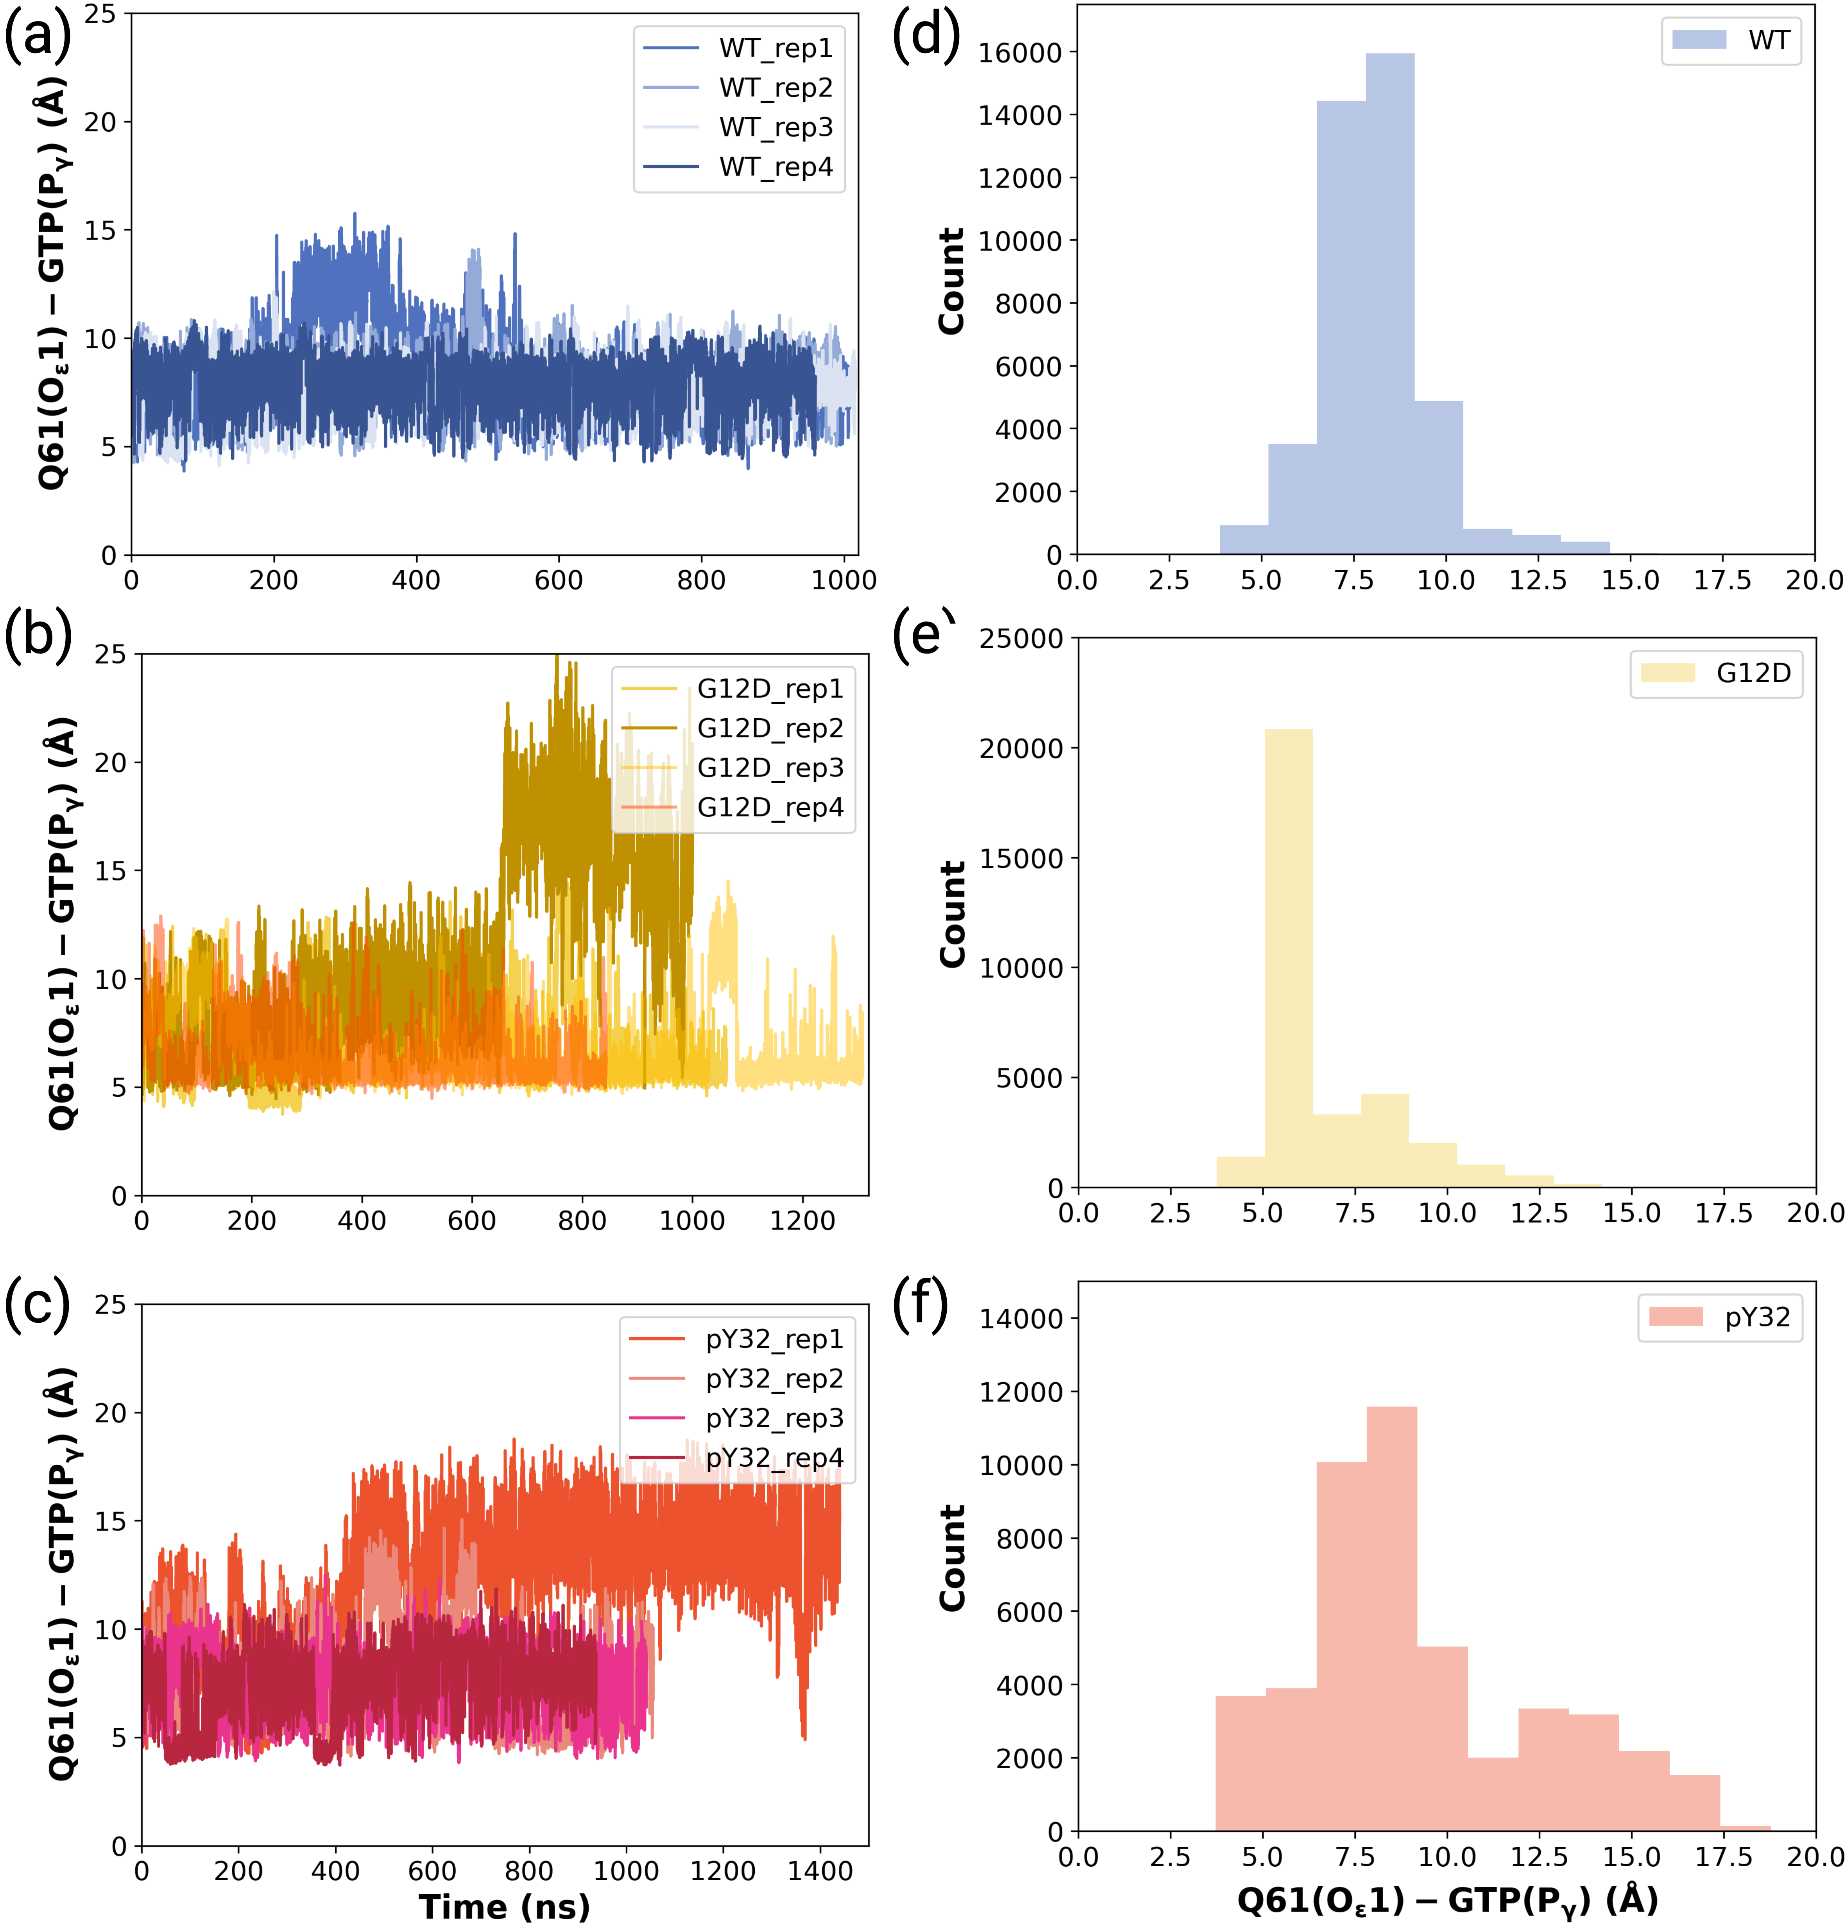

Supplement: supp [file elife-79747-supp-v2.zip › elife_poa_e79747_Figure_4_figure_supplement_3.png]

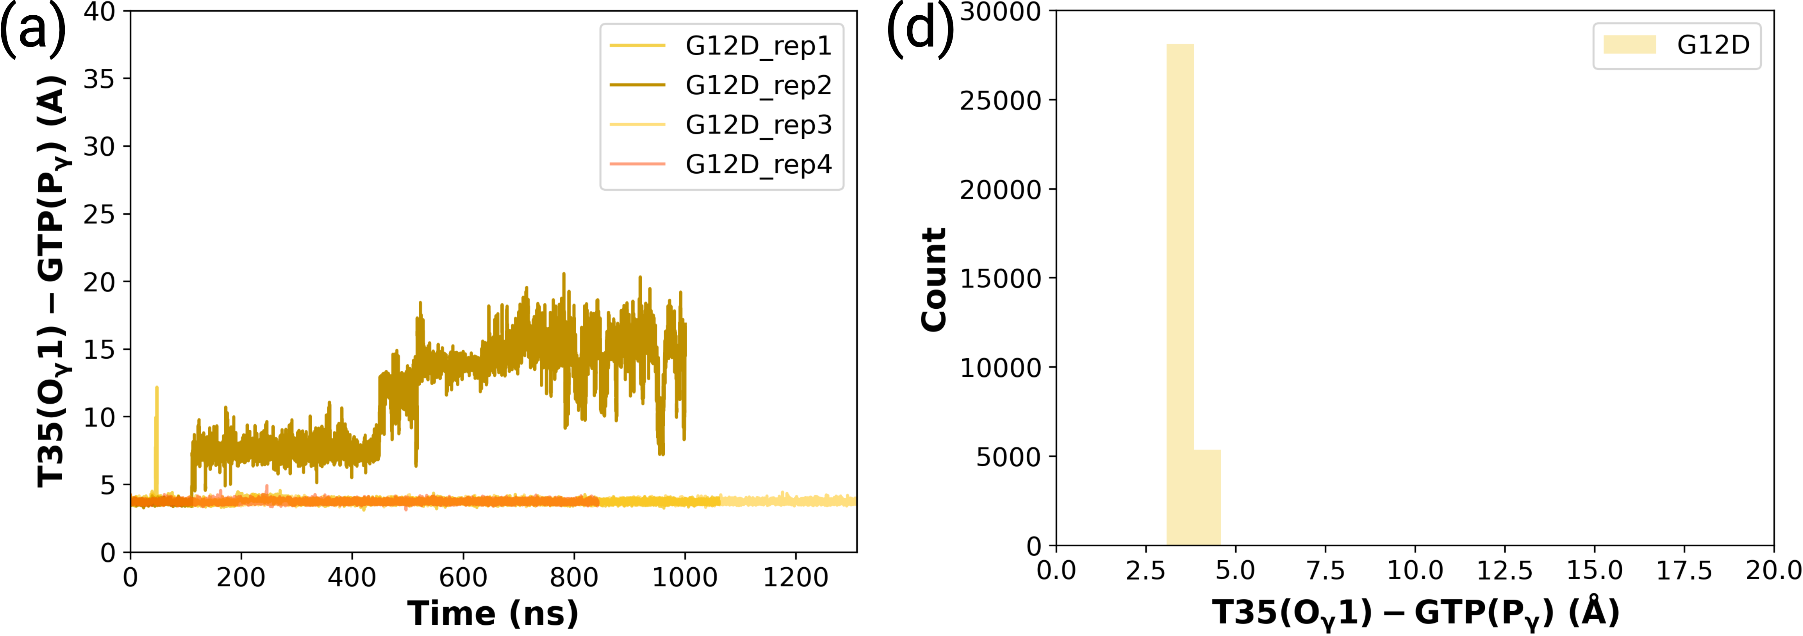

Supplement: supp [file elife-79747-supp-v2.zip › elife_poa_e79747_Figure_5_figure_supplement_1.png]

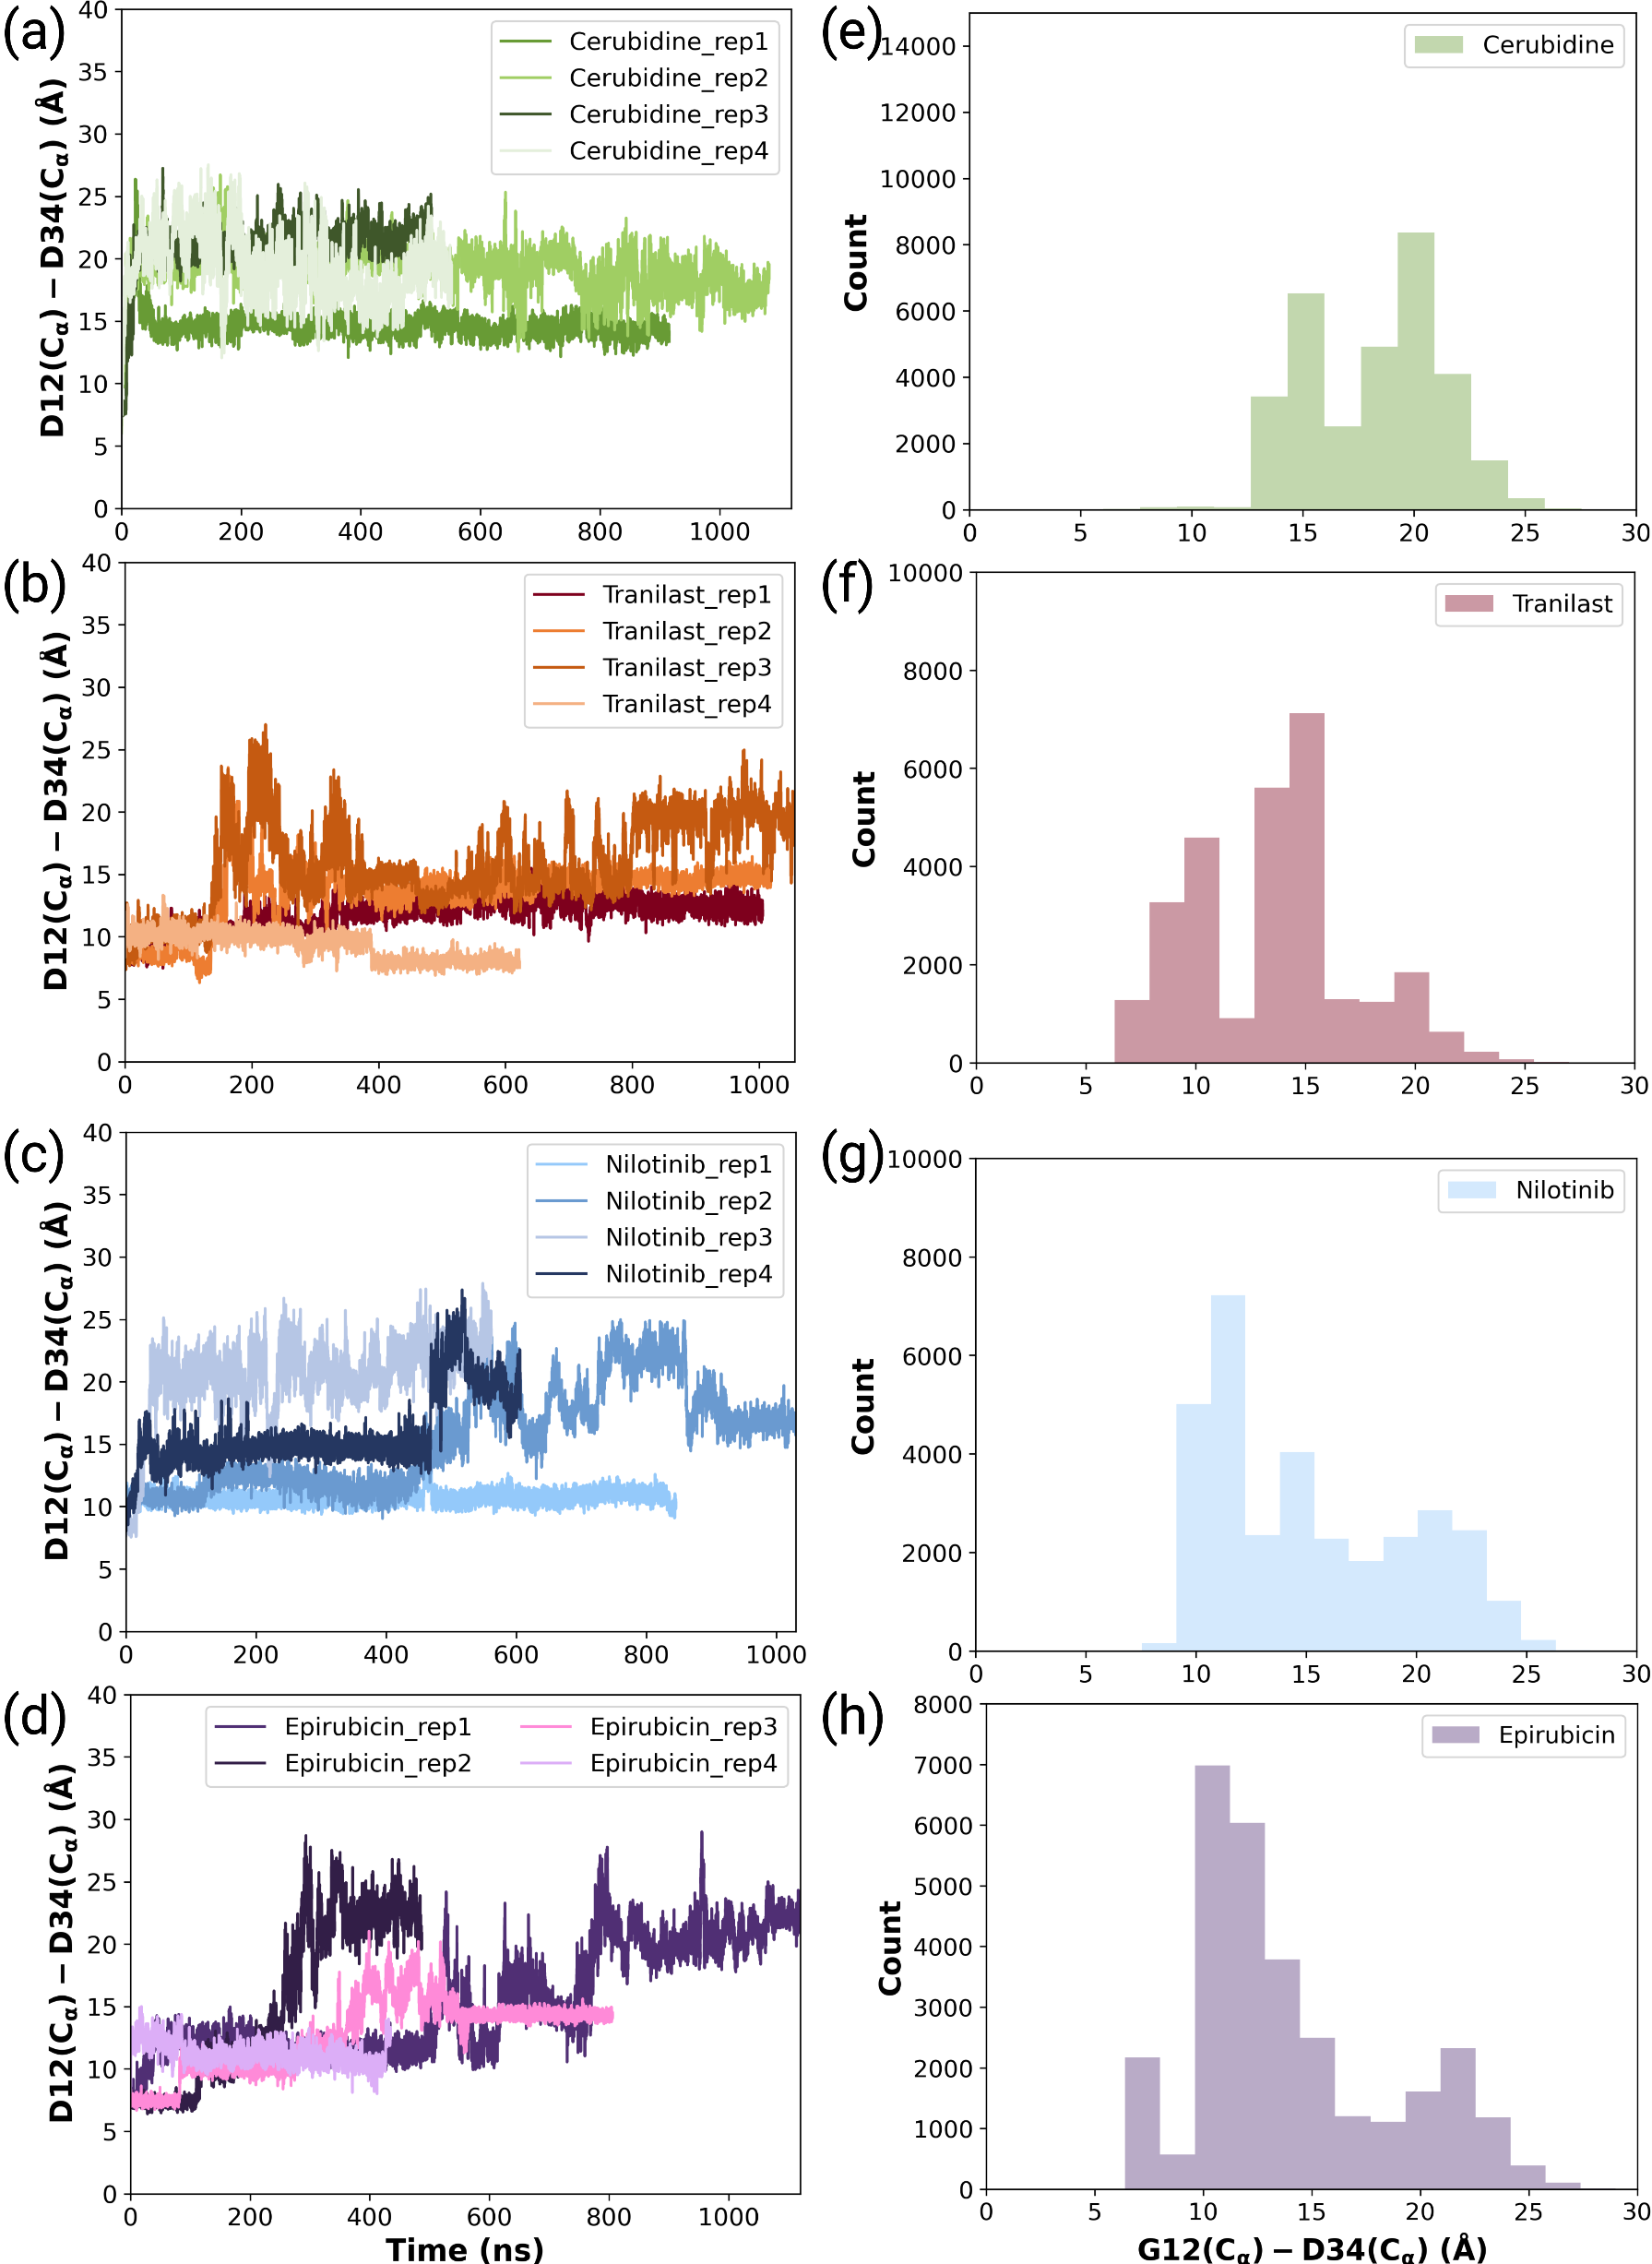

Supplement: supp [file elife-79747-supp-v2.zip › elife_poa_e79747_Figure_7_figure_supplement_1.png]

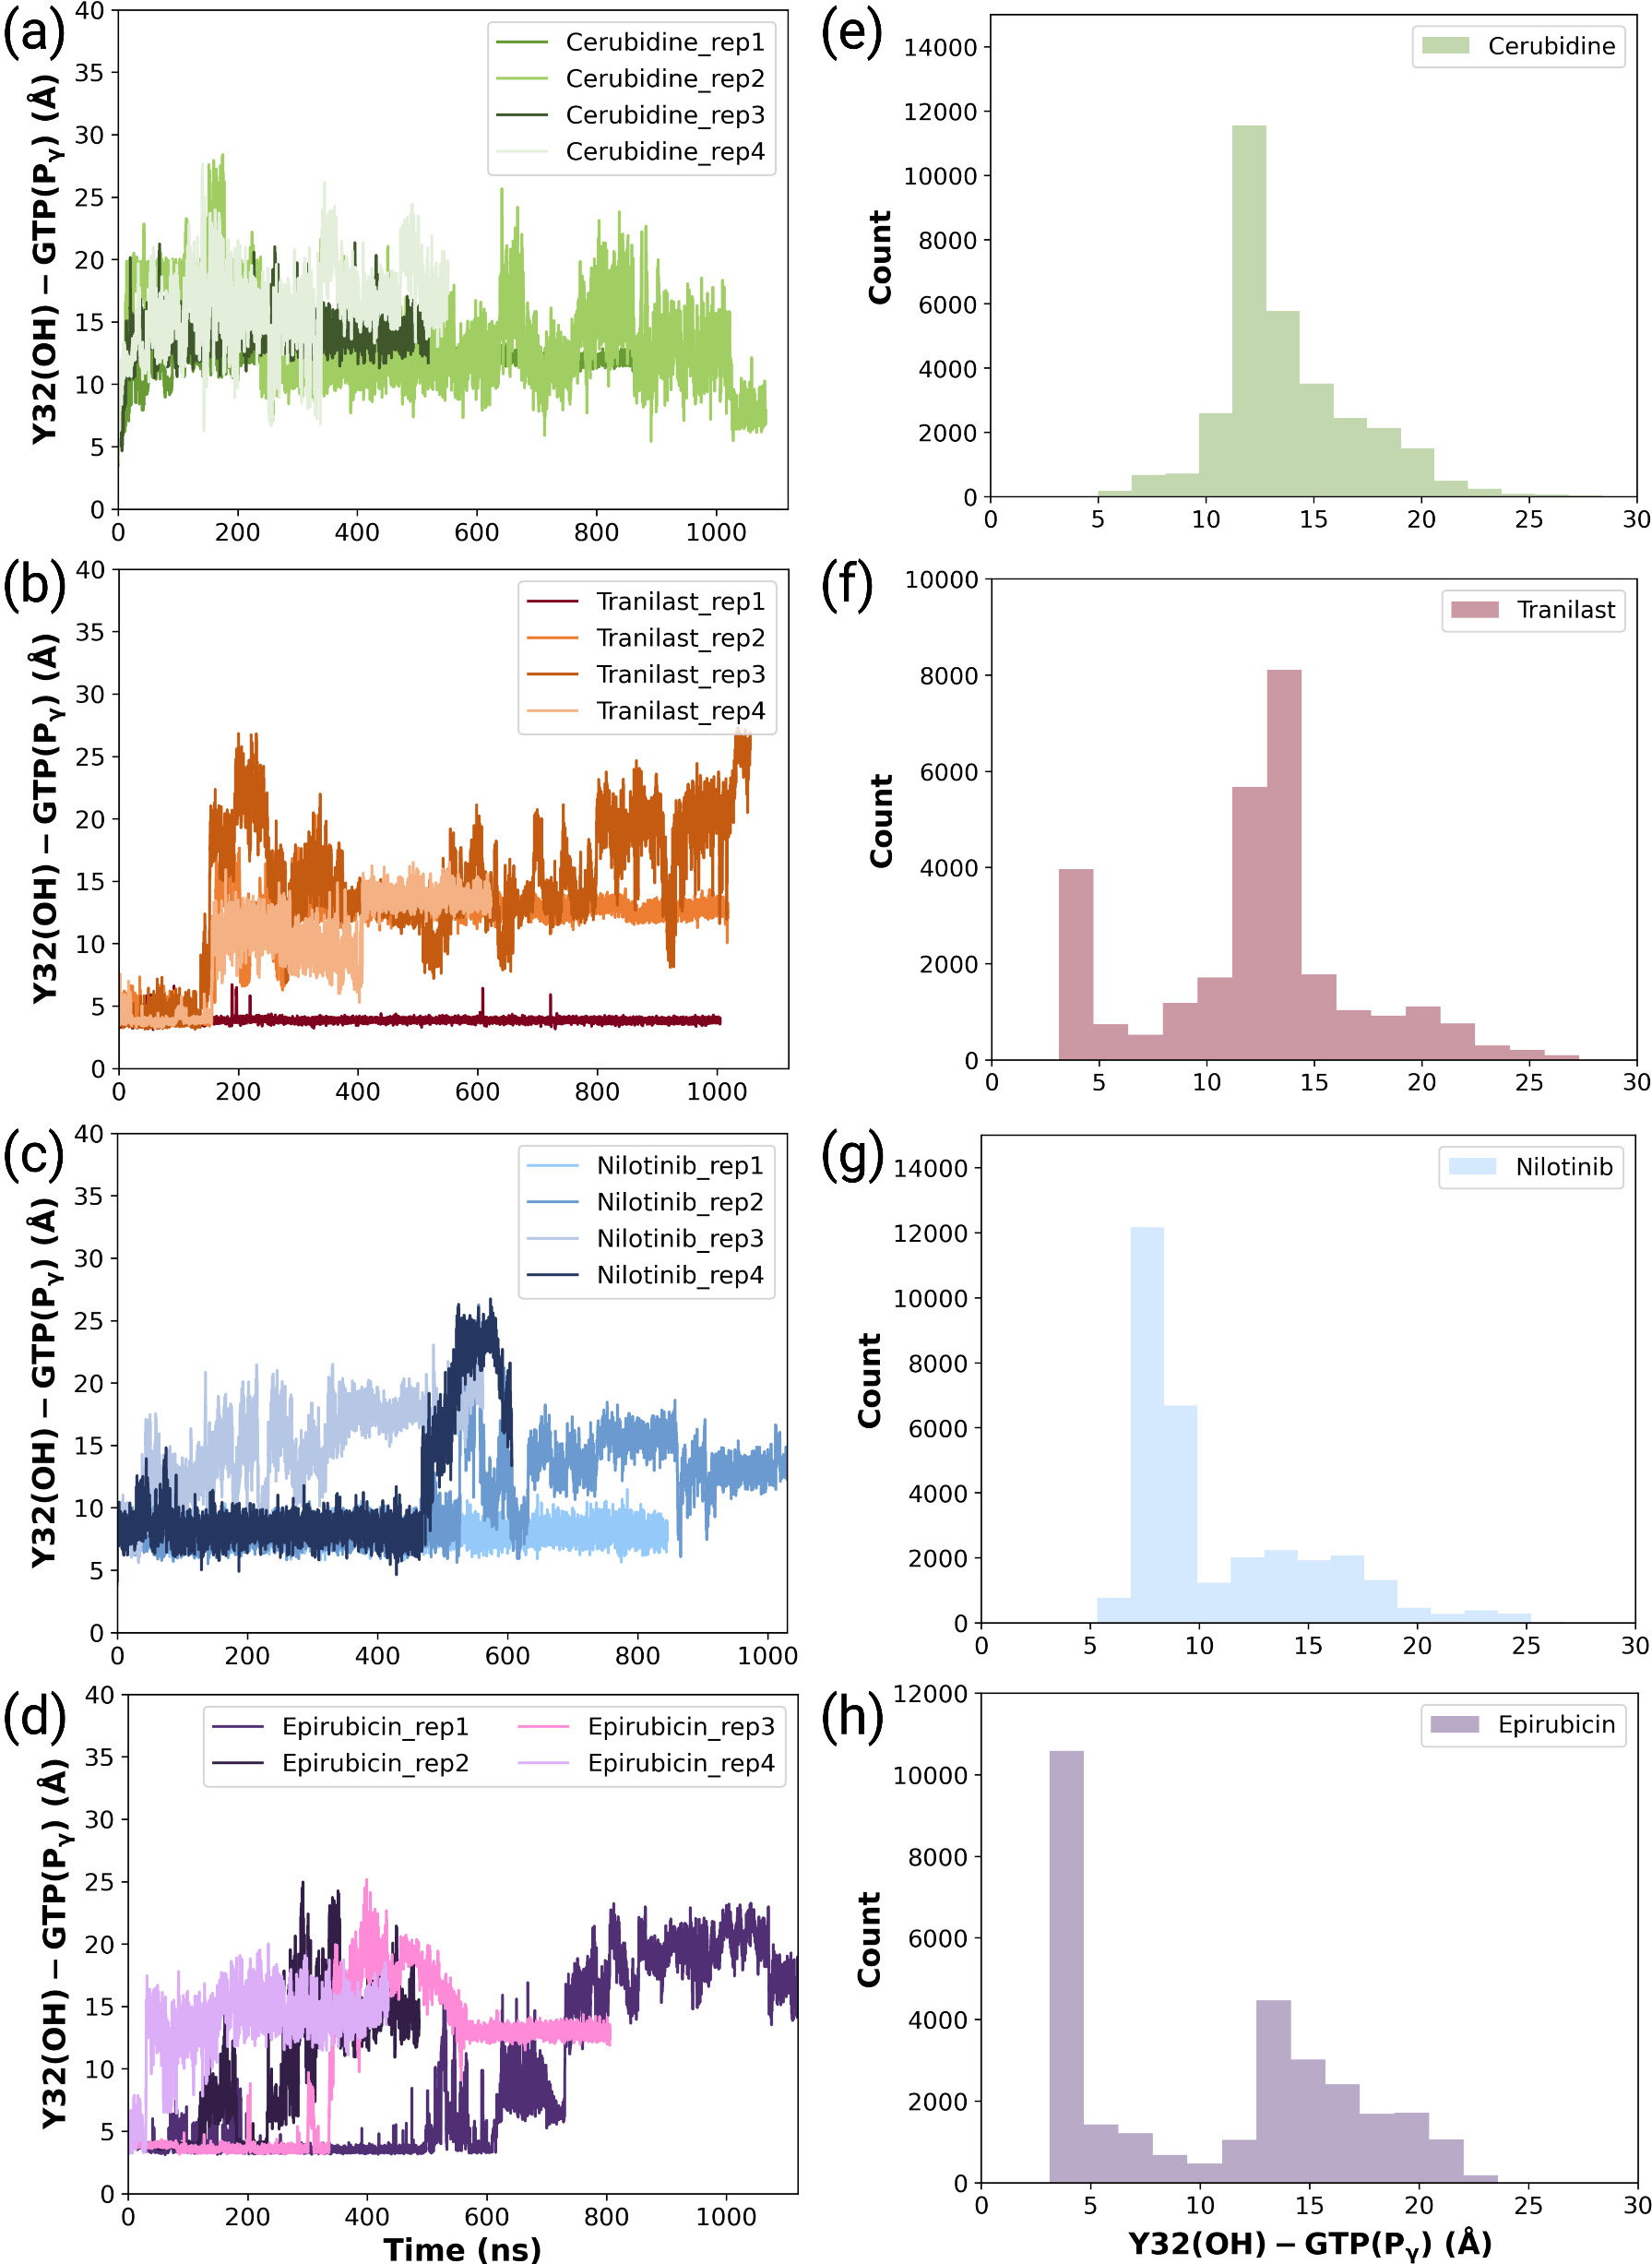

Supplement: supp [file elife-79747-supp-v2.zip › elife_poa_e79747_Figure_7_figure_supplement_2.png]

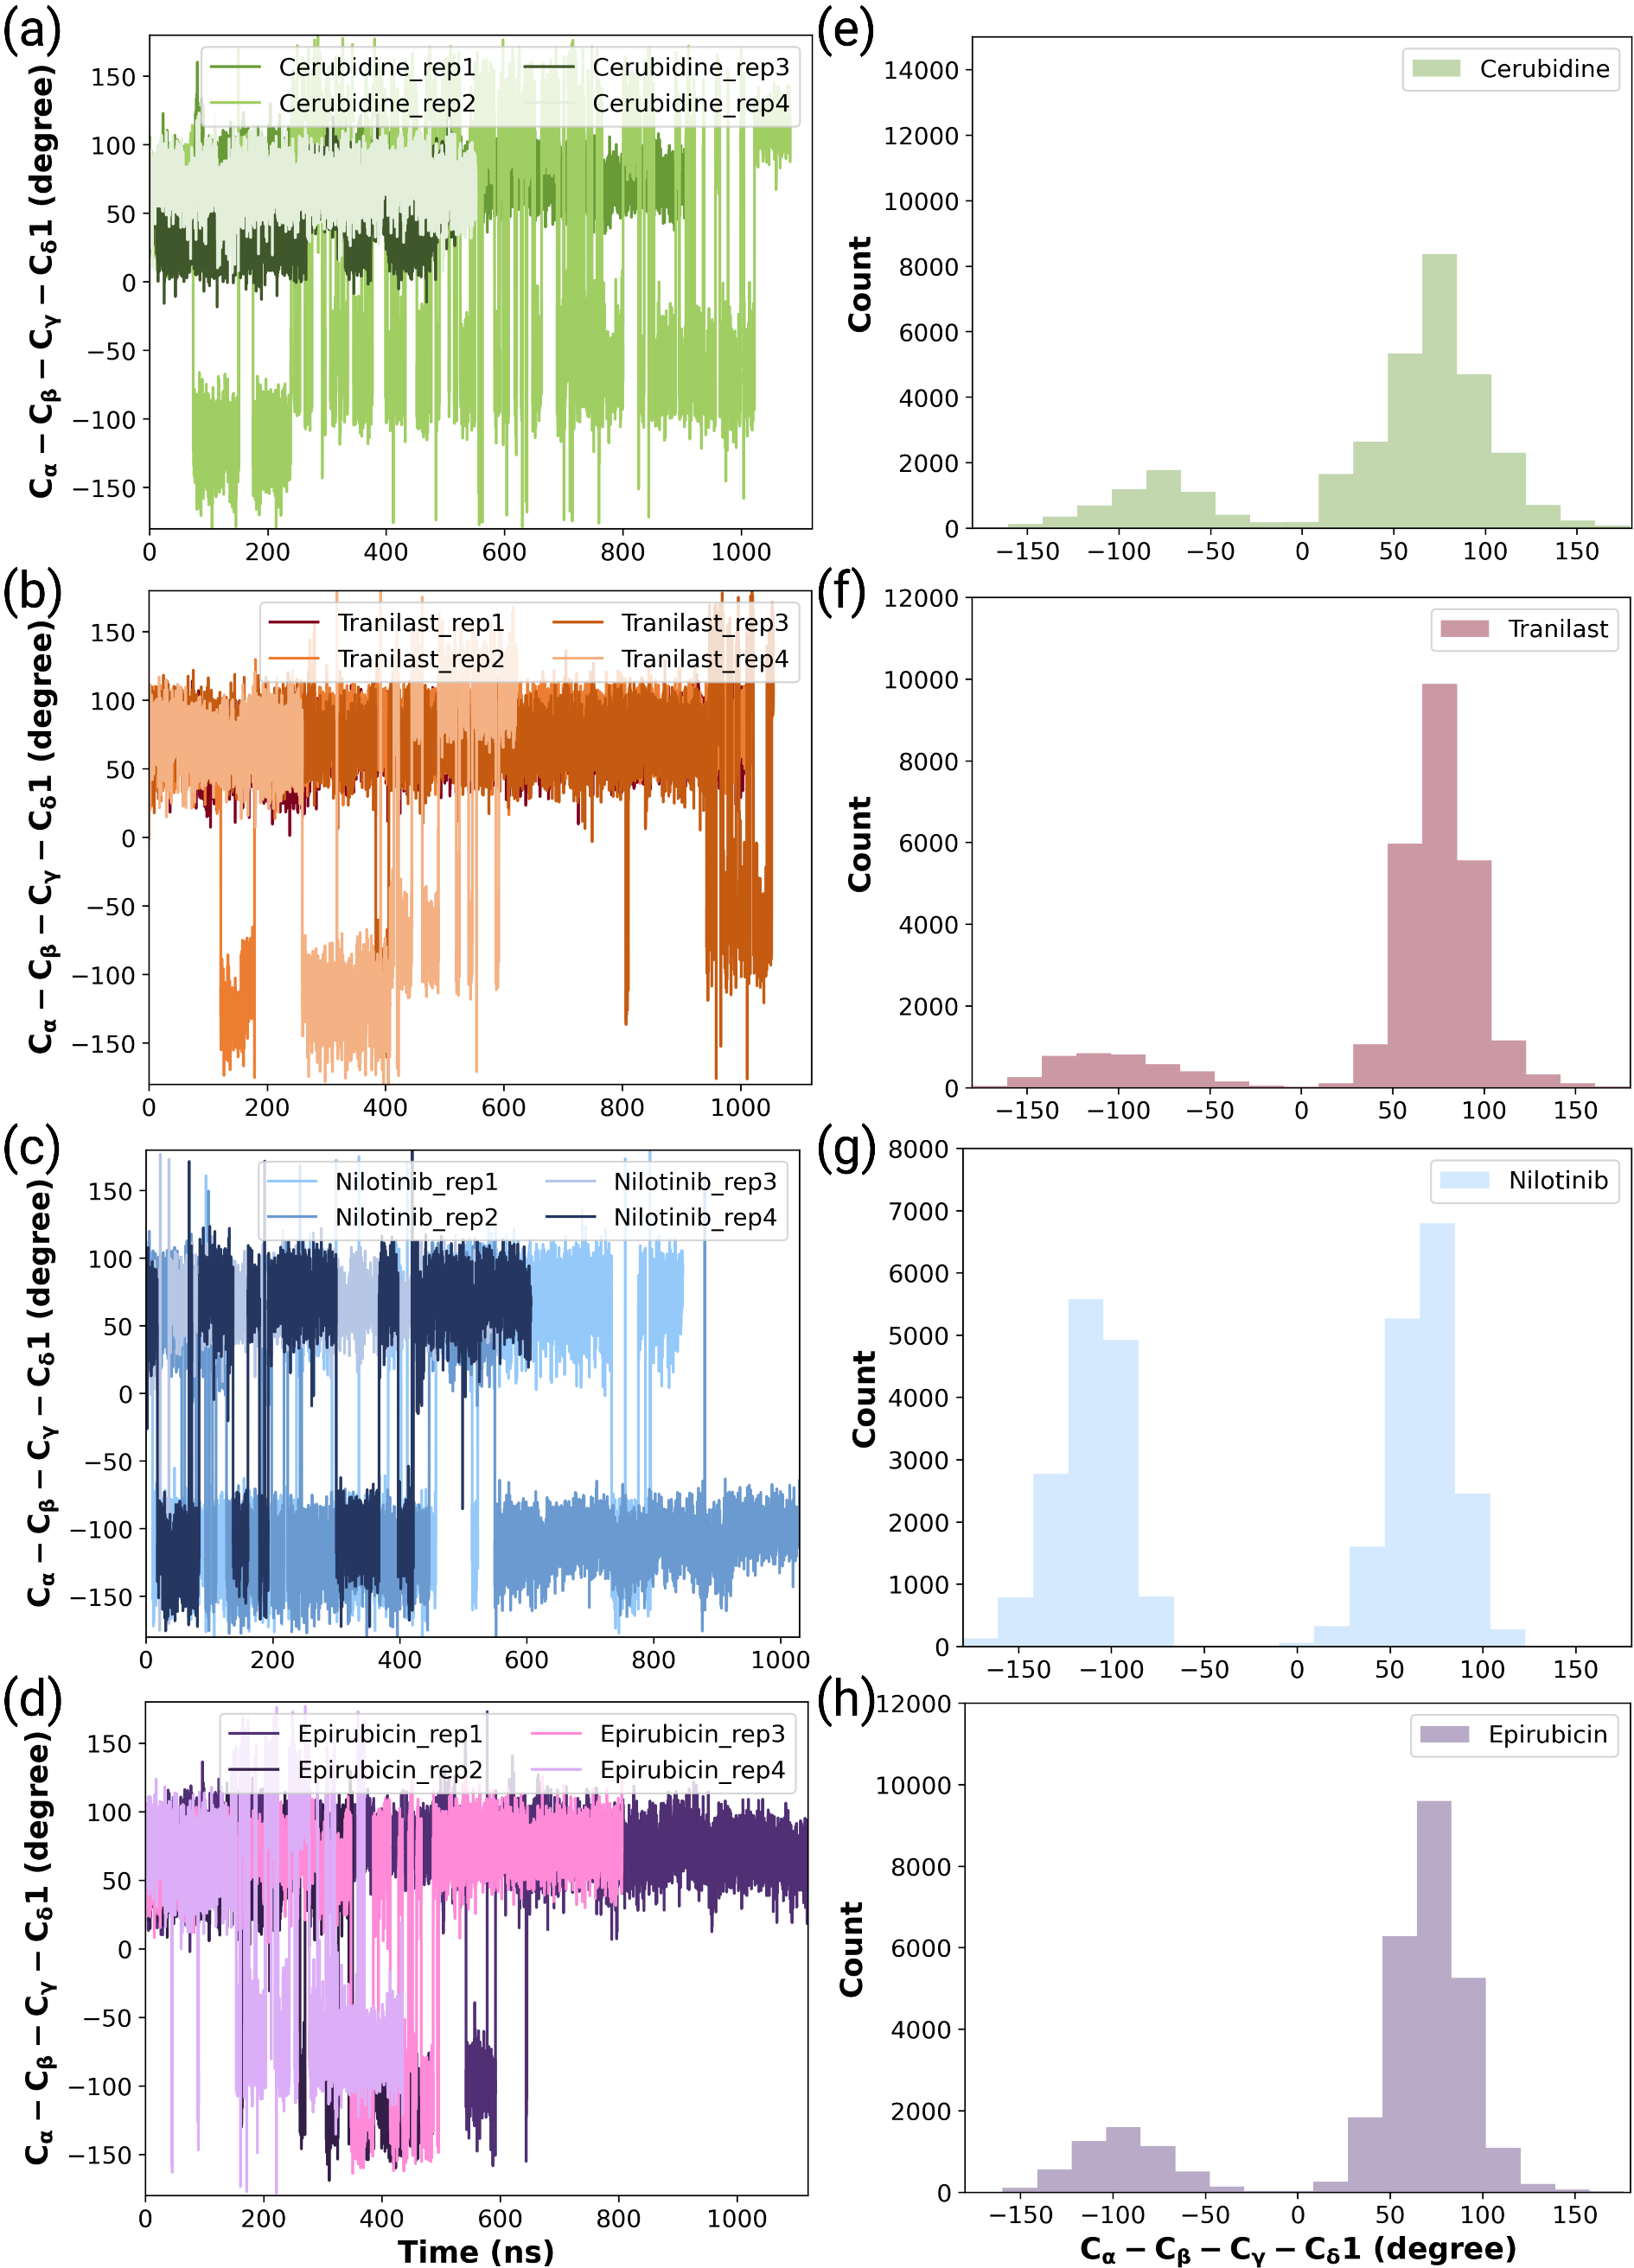

Supplement: supp [file elife-79747-supp-v2.zip › elife_poa_e79747_Figure_7_figure_supplement_3.png]
